# Supplementary material for: Polθ promotes the repair of 5′-DNA-protein crosslinks by microhomology-mediated end-joining
Source: PubMed Central journal article supplement — Cell Rep. Author manuscript; Available in PMC 2021 Nov 3. (PMC8565190; doi:10.1016/j.celrep.2021.108820), 2021-03-09
Supplement: NIHMS1683119-supplement-1.pdf [file NIHMS1683119-supplement-1.pdf]

**Supplemental information**

**Pol $\theta$  promotes the repair of 5'-DNA-protein  
crosslinks by microhomology-mediated end-joining**

**Gurushankar Chandramouly, Shuren Liao, Timur Rusanov, Nikita Borisonnik, Marissa L. Calbert, Tatiana Kent, Katherine Sullivan-Reed, Umeshkumar Vekariya, Ekaterina Kashkina, Tomasz Skorski, Hong Yan, and Richard T. Pomerantz**

**Figure S1**

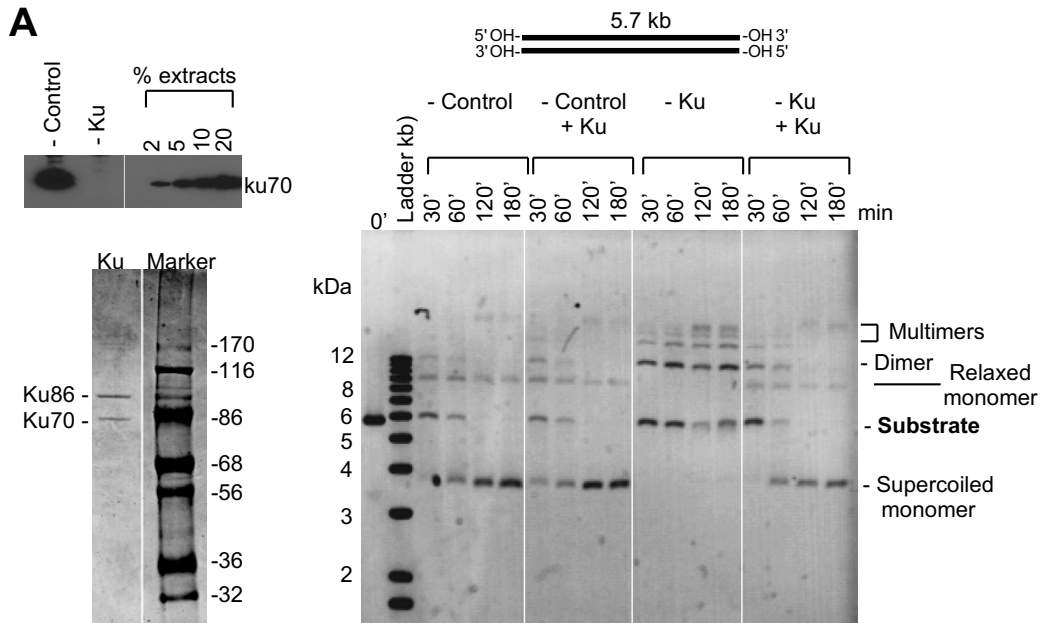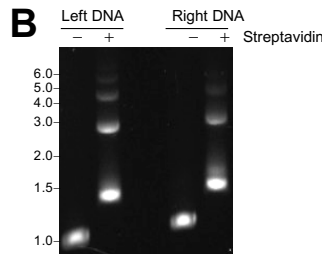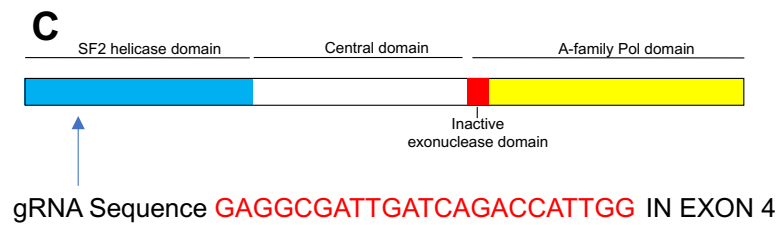

CTAACAGATCCATCTTATTTTCCTCTAT**GAGGCGATTGATCAGACCATTGG**CTCTCT  
CAATTGTGCAGACTGCAATATCCAATGAAGAGAAATGCCTTGATGGAGA

HEK 293T POLQ -/- CLONE # 4: -1/-1 bp, 1 bp deletion in both alleles:  
**CAGTCTGCACAATTGAGAGAGCCAATG-TCTGATCAATCGCCTCATAGAGGAAA**

**Figure S1. Controls for testing the structural and genetic requirements for MMEJ of DSBs.**

**(A)** Controls showing Ku depletion has no effect on intermolecular DSB repair in *Xenopus* egg extracts. Western blot showing depletion of Ku (-Ku) and positive control for anti-body and presence of Ku via Western blot of control extracts (Control; % extracts)(top left). SDS protein gel showing purified recombinant Ku proteins (bottom left). Gel showing a time course of DNA end-joining products formed in *Xenopus* egg extracts from the <sup>32</sup>P-internally labeled DNA substrate indicated at top (right). Supercoiled monomer and relaxed monomer products require the presence of Ku (compare right two panels). Multimers which are due to Polq-dependent MMEJ occur more efficiently in the absence of Ku (second panel from right), indicating competition between NHEJ and MMEJ. -control, mock depleted extracts; -control +Ku, mock depleted extracts with recombinant Ku proteins added; -Ku, Ku depleted extracts; -Ku +Ku, Ku depleted extracts with recombinant Ku added back.

**(B)** Non-denaturing gel showing left and right DNA MMEJ reporter constructs with and without streptavidin conjugation. Slower migration of DNA demonstrates streptavidin conjugation.

**(C)** gRNA sequence used to generate *POLQ*<sup>-/-</sup> HEK293T cells via CRISPR-Cas9 engineering. Schematic representation of human Polq with protein domains indicated. Approximate location of the gRNA sequence (red) designed from Exon 4 is indicated. The genome sequence flanking the gRNA sequence (red) is shown in grey. *POLQ*<sup>-/-</sup> clone #4 was generated by CRISPR-Cas9 engineering and carries a 1 bp deletion in both alleles. Sequence of the region harboring the 1 bp deletion is indicated in blue.

**Figure S2**

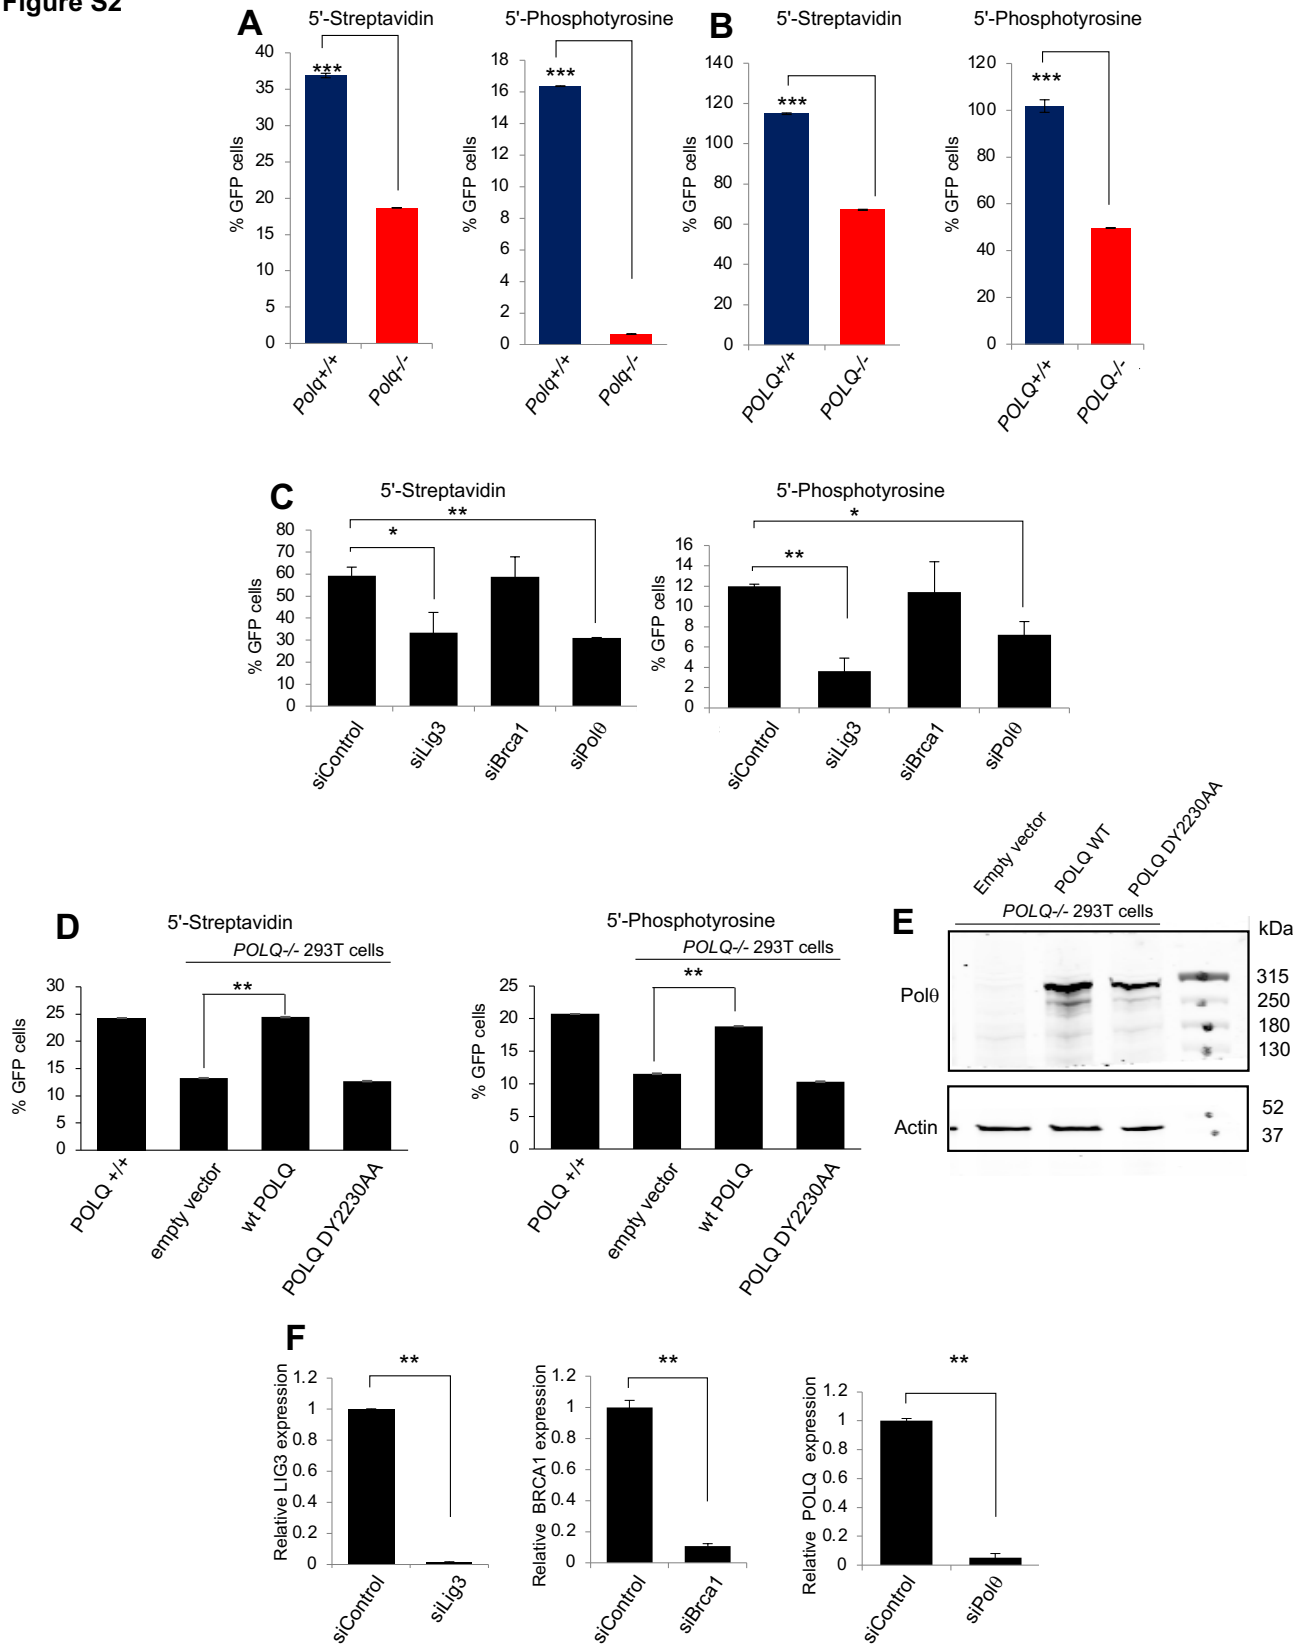

**Figure S2. Controls for Pol $\eta$ -dependent MMEJ repair of 5' DPCs in cells.**

**(A)** Bar plot showing relative GFP following co-transfection of left and right MMEJ reporter DNA constructs conjugated with streptavidin (left) and following co-transfection of left and right MMEJ reporter DNA constructs conjugated with phosphotyrosine (right) in *Polq*<sup>+/+</sup> and *Polq*<sup>-/-</sup> mESCs. GFP<sup>+</sup> frequencies are normalized to transfection efficiency. Raw data pooled from two separate experiments performed in triplicate for each condition. +/-s.e.m. \* P < 0.05, \*\*P<0.01, \*\*\*P<0.001. \* = statistical significance from two sample *t*-test between *Polq*<sup>+/+</sup> vs *Polq*<sup>-/-</sup>. P = 0.0003 (left). P = 0.001 (right).

**(B)** Same in *POLQ*<sup>+/+</sup> and *POLQ*<sup>-/-</sup> HEK293T cells. GFP<sup>+</sup> frequencies are normalized to transfection efficiency. Raw data pooled from two separate experiments performed in triplicate for each condition. +/-s.e.m. \* P < 0.05, \*\*P<0.01, \*\*\*P<0.001. \* = statistical significance from two sample *t*-test between *POLQ*<sup>+/+</sup> vs *POLQ*<sup>-/-</sup>. P = 0.00006 (left). P = 0.0001 (right)

**(C)** Bar plot showing relative GFP following co-transfection of left and right MMEJ reporter DNA constructs conjugated with streptavidin (left), following co-transfection of left and right MMEJ reporter DNA constructs conjugated with phosphotyrosine (right) in *Polq*<sup>+/+</sup> mESCs and following co-transfection of siRNA control, siRNA against LIG3, siRNA against BRCA1 and siRNA against Pol $\eta$  in *Polq*<sup>+/+</sup> mESCs. GFP<sup>+</sup> frequencies are normalized to transfection efficiency. Raw data pooled from two separate experiments performed in triplicate for each condition. +/-s.e.m. \* P < 0.05, \*\*P<0.01, \*\*\*P<0.001. \* = statistical significance from two sample *t*-test between si control vs si Lig3, P = 0.048; si control vs siPolq, P = 0.009 (left), between si control vs si Lig3, P = 0.01; si control vs siPolq, P = 0.02 (right).

**(D)** Bar plot showing relative GFP following overexpression of indicated plasmids and co-transfection of left and right MMEJ reporter DNA constructs conjugated with streptavidin (left) and following co-transfection of left and right MMEJ reporter DNA constructs conjugated with phosphotyrosine (right) in HEK293T cells. GFP<sup>+</sup> frequencies are normalized to transfection efficiency. Raw data pooled from one experiment performed in triplicate for each condition. +/-s.e.m. \* P < 0.05, \*\*P<0.01, \*\*\*P<0.001. \* = statistical significance from two sample *t*-test between Empty vector vs wtPOLQ. P = 0.002 (left), P = 0.001 (right)

**(E)** Immunoblot with whole cell extracts of *POLQ*<sup>-/-</sup> HEK293T cells that were overexpressed with indicated plasmids and used for assay in S2C. Immunoblotting was performed against POLQ antibody (top) and actin (bottom, loading control)

**(F)** RT qPCR analysis of Lig3, Brca1 and Polq expression. mRNA levels were corrected with internal control for GAPDH in siRNA-treated cells used in Figures 4F and S2C as well as normalized to non-targeting siRNA (siControl = 1). Data represent mean. n = 3 +/-s.e.m. \* P < 0.05, \*\*P<0.01, \*\*\*P<0.001. Statistical significance was determined from two sample *t*-test. P values are as follows: siControl vs siLig3 = 0.005; siControl vs siBrca1 = 0.002; siControl vs siPolq = 0.003

Figure S3

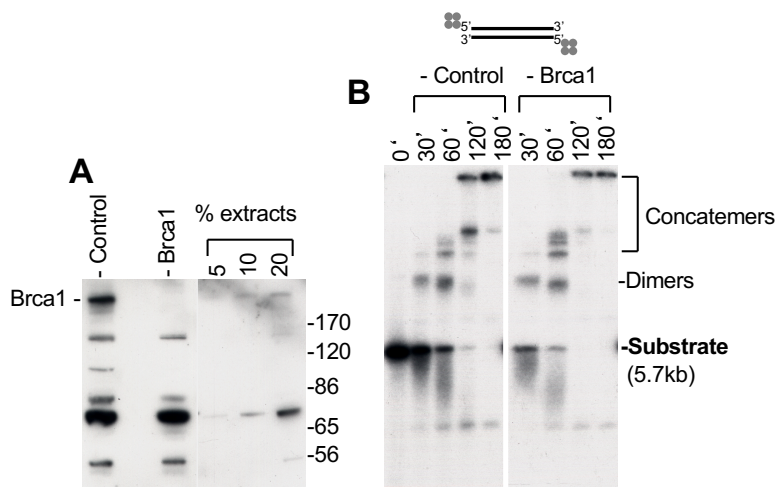

**Figure S3 MMEJ repair of 5' DPCs occurs in the absence of BRCA1**

**(A)** Western blots showing the presence and absence of BRCA1 in mock depleted (control) and BRCA1 depleted *Xenopus* egg extracts. % extracts loaded indicated at right.

**(B)** Non-denaturing gels showing a time course of DSB repair of the indicated DNA substrate in mock depleted (control; left) and BRCA1 depleted (right) *Xenopus* egg extracts.

**Table S1**

| Oligo name | Sequence (5'-3')                                |
|------------|-------------------------------------------------|
| RP 500B    | /5Biosg/GCTAGCCAGTCAGTGGGCCCGC                  |
| RP 503B    | /5Biosg/TGATTACGCCAAGTTAATTAAGGACGTCCTCCTGCTGG  |
| RP506B     | /5Biosg/AAAAAAAAAAATCGGGCATGGCGGACTTGAAGAAGTCG  |
| RP507B     | /5Biosg/AAAAAAAAAAAGCCCGAAGGCTACGTCCAGGAGCG     |
| RP506PT    | (5'-ptyr)AAAAAAAAAAATCGGGCATGGCGGACTTGAAGAAGTCG |
| RP507PT    | (5'-ptyr)AAAAAAAAAAAGCCCGAAGGCTACGTCCAGGAGCG    |
